# Supplementary material
Source: PubMed Central journal article supplement (PMC3410268)
Supplement: supp_jc.2012-1422_12-1422_Supplement_Tables_1-3_resubmission.pdf [file supp_jc.2012-1422_12-1422_Supplement_Tables_1-3_resubmission.pdf]

1  
2

**Supplemental Table 1**

**Characteristics of Study Sample (N=1316)**

|                                      | Women with natural FMP |
|--------------------------------------|------------------------|
| Age at FMP (years), median (mean±SD) | 51.5 (51.3±2.6)        |
| Race/Ethnicity, n (%)                |                        |
| Caucasian                            | 559 (42.5)             |
| African Americans                    | 413 (31.4)             |
| Chinese                              | 132 (10.0)             |
| Japanese                             | 141 (10.7)             |
| Hispanic                             | 71 ( 5.4)              |
| Enrollment site, n (%)               |                        |
| Detroit                              | 226 (17.2)             |
| Boston                               | 211 (16.0)             |
| Chicago                              | 205 (15.6)             |
| Pittsburgh                           | 157 (11.9)             |
| Oakland                              | 211 (16.0)             |
| Los Angeles                          | 204 (15.5)             |
| Newark                               | 102 ( 7.6)             |
| <b>Baseline characteristics</b>      |                        |
| BMI (kg/m <sup>2</sup> ), n (%)      |                        |
| Normal (<25)                         | 561 (42.6)             |
| Overweight (25-29.9)                 | 333 (25.3)             |
| Obese (≥30)                          | 422 (32.1)             |
| Physical activity score, mean±SD     | 7.7±1.8                |
| Smoking status, n (%)                |                        |
| Never                                | 761 (57.8)             |
| Ever                                 | 317 (24.1)             |
| Current                              | 232 (17.6)             |
| Missing                              | 6 ( 0.5)               |
| General health status, n (%)         |                        |
| Excellent                            | 208 (15.8)             |
| Very good                            | 496 (37.7)             |
| Good                                 | 373 (28.3)             |
| Fair                                 | 126 ( 9.6)             |
| Poor                                 | 24 ( 1.9)              |
| Missing                              | 89 ( 6.8)              |
| Difficulty in paying basics, n (%)   |                        |
| Very hard                            | 117 ( 8.9)             |
| Somewhat hard                        | 398 (30.2)             |
| Not hard                             | 793 (60.3)             |
| Missing                              | 8 ( 0.6)               |
| Education attainment, n (%)          |                        |
| ≤High school                         | 329 (25.0)             |
| >High school - <college              | 425 (32.3)             |
| College                              | 268 (20.4)             |
| Post graduate                        | 285 (21.7)             |
| Missing                              | 9 ( 0.7)               |

3  
4

5  
6  
7

**Supplemental Table 2**

**Factors Related to Trajectory Group Membership in the Four-group E2 Model**

| <b>Variable</b>          | <b>Coefficient estimate</b> | <b>Z-score</b> | <b>P-values</b> |
|--------------------------|-----------------------------|----------------|-----------------|
| <b>Slow Decline</b>      |                             |                |                 |
| Intercept                | -0.69                       | -3.21          | 0.001           |
| Race/Ethnicity           |                             |                |                 |
| Caucasian (reference)    | -                           |                |                 |
| African Americans        | 0.63                        | 1.87           | 0.06            |
| Chinese                  | 1.63                        | 4.43           | <.0001          |
| Japanese                 | 0.99                        | 3.06           | 0.002           |
| Hispanic                 | 1.04                        | 1.92           | 0.06            |
| BMI (kg/m <sup>2</sup> ) |                             |                |                 |
| Normal (<25) (reference) | -                           |                |                 |
| Overweight (25-29.9)     | 0.21                        | 0.66           | 0.51            |
| Obese (≥30)              | -0.59                       | -1.14          | 0.25            |
| <b>Flat</b>              |                             |                |                 |
| Intercept                | -3.23                       | -4.13          | <.0001          |
| Race/Ethnicity           |                             |                |                 |
| Caucasian (reference)    | -                           |                |                 |
| African Americans        | 1.41                        | 3.97           | 0.0001          |
| Chinese                  | 0.70                        | 0.64           | 0.52            |
| Japanese                 | -0.08                       | -0.08          | 0.94            |
| Hispanic                 | -0.36                       | -0.56          | 0.57            |
| BMI (kg/m <sup>2</sup> ) |                             |                |                 |
| Normal (<25) (reference) | -                           |                |                 |
| Overweight (25-29.9)     | 2.26                        | 2.82           | 0.005           |
| Obese (≥30)              | 4.06                        | 5.17           | <.0001          |
| <b>Rise/Slow Decline</b> |                             |                |                 |
| Intercept                | -1.65                       | -4.93          | <.0001          |
| Race/Ethnicity           |                             |                |                 |
| Caucasian (reference)    | -                           |                |                 |
| African Americans        | 0.60                        | 1.52           | 0.13            |
| Chinese                  | 1.06                        | 2.03           | 0.04            |
| Japanese                 | 0.23                        | 0.40           | 0.69            |
| Hispanic                 | 0.36                        | 0.52           | 0.60            |
| BMI (kg/m <sup>2</sup> ) |                             |                |                 |
| Normal (<25) (reference) | -                           |                |                 |
| Overweight (25-29.9)     | 1.38                        | 3.74           | 0.0002          |
| Obese (≥30)              | -0.15                       | -0.21          | 0.83            |

8 Rise/Steep Decline trajectory is the comparison group

9

10

**Supplemental Table 3**

11

**Factors Related to Trajectory Group Membership in the Three-group FSH Model**

12

| <b>Variable</b>          | <b>Coefficient estimate</b> | <b>Z-score</b> | <b>P-values</b> |
|--------------------------|-----------------------------|----------------|-----------------|
| <b>Low</b>               |                             |                |                 |
| Intercept                | -3.64                       | -8.63          | <.0001          |
| Race/Ethnicity           |                             |                |                 |
| Caucasian (reference)    | -                           |                |                 |
| African Americans        | 0.63                        | 2.24           | 0.02            |
| Chinese                  | -0.07                       | -0.10          | 0.92            |
| Japanese                 | 0.14                        | 0.19           | 0.85            |
| Hispanic                 | 1.03                        | 2.40           | 0.02            |
| BMI (kg/m <sup>2</sup> ) |                             |                |                 |
| Normal (<25) (reference) | -                           |                |                 |
| Overweight (25-29.9)     | 1.80                        | 3.88           | 0.0001          |
| Obese (≥30)              | 3.43                        | 7.93           | <.0001          |
| <b>Medium</b>            |                             |                |                 |
| Intercept                | -0.54                       | -2.96          | 0.003           |
| Race/Ethnicity           |                             |                |                 |
| Caucasian (reference)    | -                           |                |                 |
| African Americans        | 0.01                        | 0.03           | 0.98            |
| Chinese                  | 0.14                        | 0.55           | 0.58            |
| Japanese                 | 0.63                        | 2.43           | 0.02            |
| Hispanic                 | -0.73                       | -1.67          | 0.09            |
| BMI (kg/m <sup>2</sup> ) |                             |                |                 |
| Normal (<25) (reference) | -                           |                |                 |
| Overweight (25-29.9)     | 0.87                        | 4.30           | <.0001          |
| Obese (≥30)              | 1.68                        | 7.58           | <.0001          |

13 High trajectory is the comparison group

14

15

16

17
